# Supplementary material for: The Effect of the Stress Induced by Hydrogen Peroxide and Corticosterone on Tryptophan Metabolism, Using Human Neuroblastoma Cell Line (SH-SY5Y)
Source: MDPI journal article supplement (doi:10.3390/ijms24054389), 2023-02-23
Supplement: s1 [file s1]

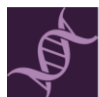

Article

# The Effect of the Stress Induced by Hydrogen Peroxide and Corticosterone on Tryptophan Metabolism, Using Human Neuroblastoma Cell Line (SH-SY5Y)

Ana Salomé Correia <sup>1,2,3</sup>, Isabel Silva <sup>4</sup>, Henrique Reguengo <sup>4,5</sup>, José Carlos Oliveira <sup>2,4,5</sup>, Francisco Vasques-Nóvoa <sup>6,7</sup>, Armando Cardoso <sup>3,8,9</sup> and Nuno Vale <sup>1,3,10, \*</sup>

<sup>1</sup> OncoPharma Research Group, Center for Health Technology and Services Research (CINTESIS), Rua Doutor Plácido da Costa, 4200-450 Porto, Portugal

<sup>2</sup> Institute of Biomedical Sciences Abel Salazar (ICBAS), University of Porto, Rua de Jorge Viterbo Ferreira 228, 4050-313 Porto, Portugal

<sup>3</sup> CINTESIS@RISE, Faculty of Medicine, University of Porto, Alameda Professor Hernâni Monteiro, 4200-319 Porto, Portugal

<sup>4</sup> Clinical Chemistry, Department of Laboratory Pathology, Hospital Center of the University of Porto (CHUP), Largo Prof. Abel Salazar, 4099-313 Porto, Portugal

<sup>5</sup> Unit for Multidisciplinary Research in Biomedicine (UMIB), University of Porto, Rua de Jorge Viterbo Ferreira 228, 4050-313 Porto, Portugal

<sup>6</sup> Cardiovascular R&D Center, Faculty of Medicine, University of Porto, Rua Doutor Plácido da Costa, s/n, 4200-450 Porto, Portugal

<sup>7</sup> Department of Surgery and Physiology, Faculty of Medicine, University of Porto, Rua Doutor Plácido da Costa, 4200-450 Porto, Portugal

<sup>8</sup> NeuroGen Research Group, Center for Health Technology and Services Research (CINTESIS), Rua Doutor Plácido da Costa, 4200-450 Porto, Portugal

<sup>9</sup> Unit of Anatomy, Department of Biomedicine, Faculty of Medicine, University of Porto, Alameda Professor Hernâni Monteiro, 4200-319 Porto, Portugal

<sup>10</sup> Department of Community Medicine, Health Information and Decision (MEDCIDS), Faculty of Medicine, University of Porto, Rua Doutor Plácido da Costa, 4200-450 Porto, Portugal

\*Correspondence: nunovale@med.up.pt; Tel.: +351-220-426-537.

## Supplementary Material

Table S1. List of the most important abbreviations

| Abbreviation                  | Meaning                    |
|-------------------------------|----------------------------|
| CORT                          | Corticosterone             |
| 5-HIAA                        | 5-hydroxyindoleacetic acid |
| 5-HT                          | Serotonin                  |
| 5-HTP                         | 5-Hydroxytryptophan        |
| H <sub>2</sub> O <sub>2</sub> | Hydrogen peroxide          |
| L-Trp                         | L-Tryptophan               |
| ROS                           | Reactive oxygen species    |
